# Supplementary material
Source: publisher site journal article supplement (https://www.dovepress.com/article/339773)
Supplement: Supplementary file 1 [file get_supplementary_file.php]

**Supplementary material**

**Interview Guide**

**Socio – demographic Information**

1. How old are you?
2. How long have you been working here?

**Information about antihypertensive medications +lifestyles modification**

1. What do you tell hypertensive patients after diagnosis?
2. How they should use their medication?
3. How to change behavior to lifestyle modification?
4. Do you tell them what might happen if they do not follow instructions?
5. Do you have any written patient information?

**Barriers to antihypertensive medication adherence**

1. According to your experience, do you know any patient(s) who do not take their medications as prescribed? If yes, why?
2. Do some patients not turn up for their visits in your facility?
3. What do you think are possible reasons for this?
4. From your experiences, would you explain more about barriers patients’ faced during taking antihypertensive medications?
5. How do you address the treatment plan for patients who do not take their medications as prescribed at your health facility?
6. In your opinion, what do you think should be done to improve the level of adherence to antihypertensive drugs among the patients?

**Barriers to blood pressure control**

1. Please tell me more about treatment and control of blood pressure:
2. Probe for:
   1. Current treatment guidelines
   2. Availability of adherence policy or guidelines
   3. How do people deal with hypertension in this area?
3. In your opinion, what sort of assistance healthcare providers should give help to their patients to manage their disease?
4. Why patients with hypertension did not control their blood pressure?
5. Patients related barriers (high medication cost, side effect, use of traditional medicine, financial, lack of awareness, belief on being treatable, poor adherence to medication, low motivation to treatment and life style changes…)
6. Community related barriers (lack of support to families, cultural beliefs, stigma, social support, low community awareness)
7. Healthcare system related barriers (shortage of equipment, shortage of staffs, shortage of space)
8. Health care providers related barriers (time constraint, lack of follow up, lack of providing sufficient information, lack of time for consultation, not following guidelines, low clinical inertia, communication skills, poor providers’ attitude, provider patient relationship.)
9. What could be improved in the health facility for patients’ control of their blood pressure?
10. What do you think the most important factor for controlling blood pressure?
    1. Medication
    2. Lifestyle modification
    3. Combination
11. When do you believe treatment is successful if…?
    1. Adherent to medication
    2. No symptoms
    3. Attending appointments
    4. Target blood pressure reached

**Thank you for your efforts and contributions during the interviews.**
